# Supplementary material for: Sonochemical synthesis of highly fluorescent glutathione-stabilized Ag nanoclusters and S2− sensing
Source: Royal Society of Chemistry journal article supplement (doi:10.1039/c2nr30718a), 2012-01-01
Supplement: c2nr30718a.pdf [file c2nr30718a.pdf]

Electronic Supplementary Information on

## **Sonochemical synthesis of highly fluorescent glutathione-stabilized Ag nanoclusters and S<sup>2-</sup> sensing**

Tingyao Zhou,<sup>a</sup> Mingcong Rong,<sup>a</sup> Zhimin Cai,<sup>a</sup> Chaoyong James Yang<sup>a</sup>, and Xi Chen<sup>a,b\*</sup>

<sup>a</sup> *Department of Chemistry and Key Laboratory of Analytical Sciences of Xiamen University, College of Chemistry and Chemical Engineering, Xiamen University, Xiamen 361005, China.*

*Fax: +86 592 2184530; Tel: +86 592 2184530; E-mail: xichen@xmu.edu.cn*

<sup>b</sup> *State Key Laboratory of Marine Environmental Science, Xiamen University, Xiamen 361005, China*

### **Experimental Section**

#### **Chemicals.**

L-Glutathione (GSH, reduced, 99%) was purchased from Sigma-Aldrich. Silver nitrate (ACS, 99.9+%) was purchased from Alfa Aesar. All chemicals were used without further purification. Ultra-pure water with a resistivity 18.2 MΩ cm obtained from a Millipore purification system was used for the experiments.

#### **Synthesis of Ag nanoclusters (AgNCs).**

Briefly, 21.2 mg AgNO<sub>3</sub> dissolved in 5.0 mL water was slowly added to 153.6 mg GSH in 20 mL water with vigorous stirring. The solution became turbid due to the formation of a silver thiolate suspension<sup>1</sup>, then the pH was adjusted by dropwise addition of a 1 M solution of NaOH until the turbid solution became clear (pH~5.0). The mixture was irradiated with ultrasound (Ultrasonic Cleaner AS2060B, 40 KHz, 60 W) in the dark for different times.

#### **Characterization**

UV-Vis absorption and fluorescence spectra were obtained with a UV2300 spectrophotometer (Techcomp) and a F-4500 spectrophotometer (Hitachi), respectively. 0.9 mL AgNCs solution without post-preparative treatment was diluted with 2.1 mL water for recording the spectra. Transmission electron microscope (TEM) images and energy dispersive X-ray (EDX) spectra were collected using a TECNAI F-30(Netherlands). FT -IR spectra were recorded with a Nicolet 380

spectrophotometer. Matrix-assisted laser desorption ionization time-of-flight (MALDI-TOF) mass spectrum analysis with positive-ion mode was conducted with a Bruker Daltonics - microflex MALDI TOF-MS. The MALDI sample was prepared by mixing dialyzed AgNCs with an equal volume of  $\alpha$ -cyano-4-hydroxycinnamic acid.

## References

1. I. G. Dance, *Polyhedron*, 1986, **5**, 1037.

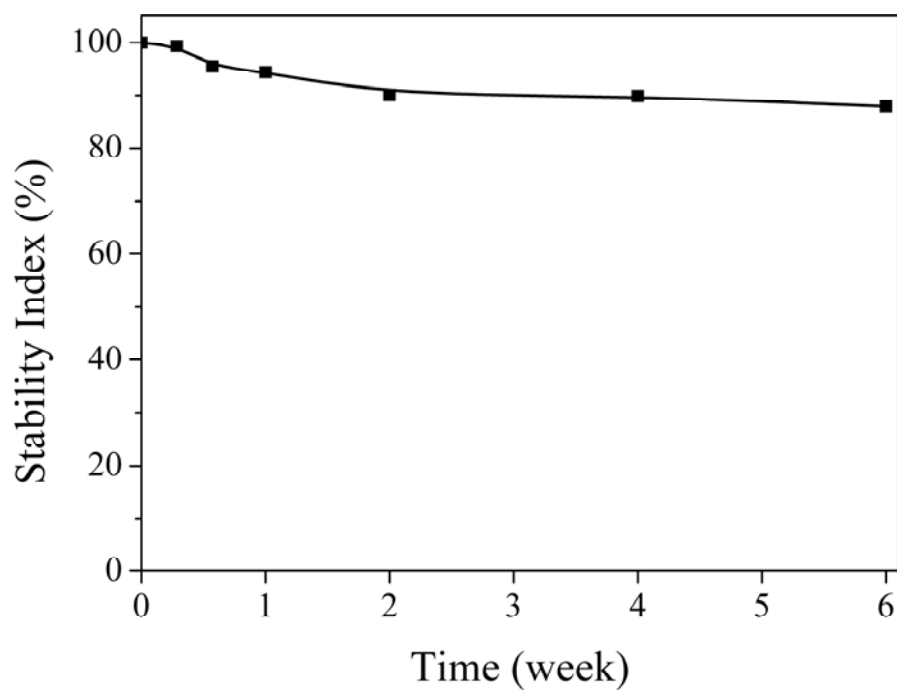

**Fig. S1** The stability of the as-prepared fluorescent AgNCs at different storage time.

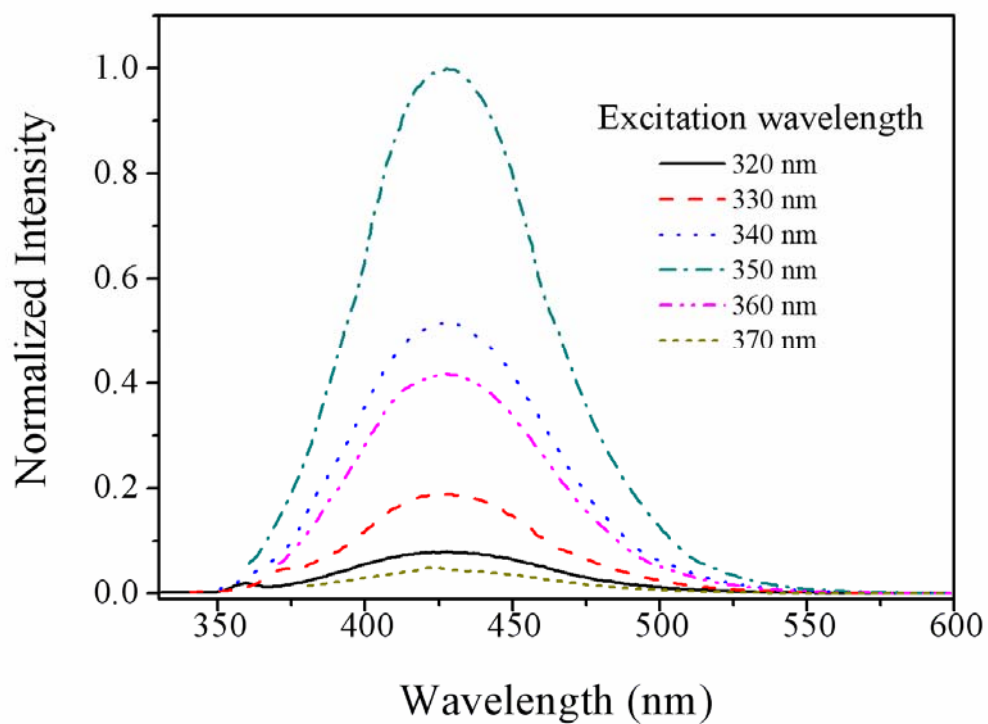

**Fig. S2** Emission spectra of fluorescent AgNCs prepared by sonochemical synthesis with different excitation wavelengths from 320 to 370 nm.

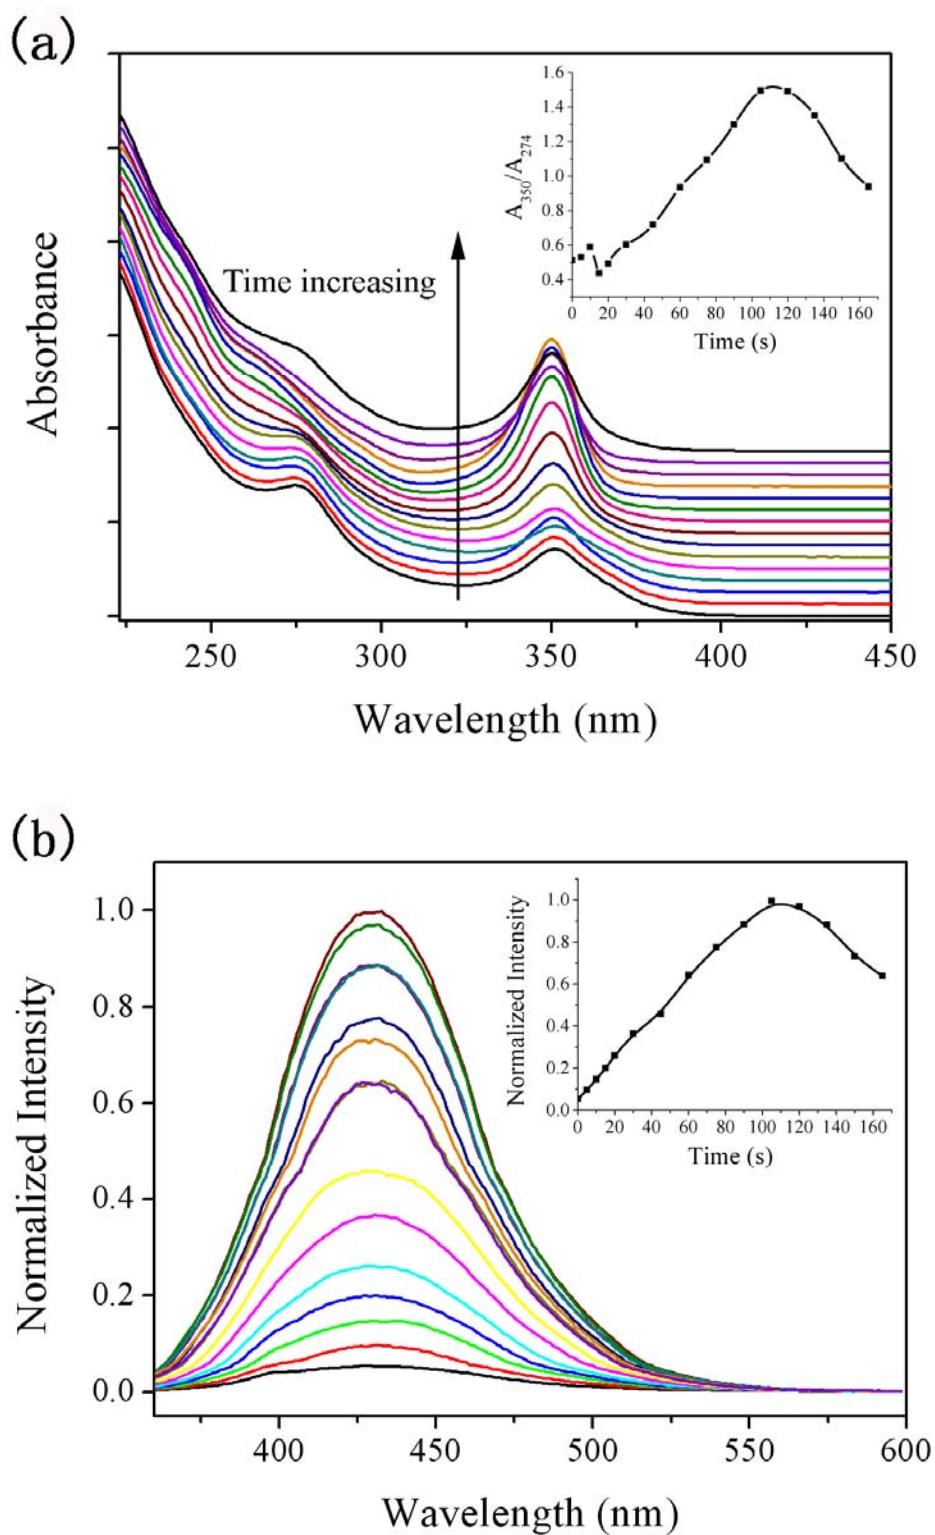

**Fig. S3** UV-Vis absorption spectra (a) and emission spectra (b) of fluorescent AgNCs under different ultrasonic irradiation times. The excitation wavelength was 350 nm.

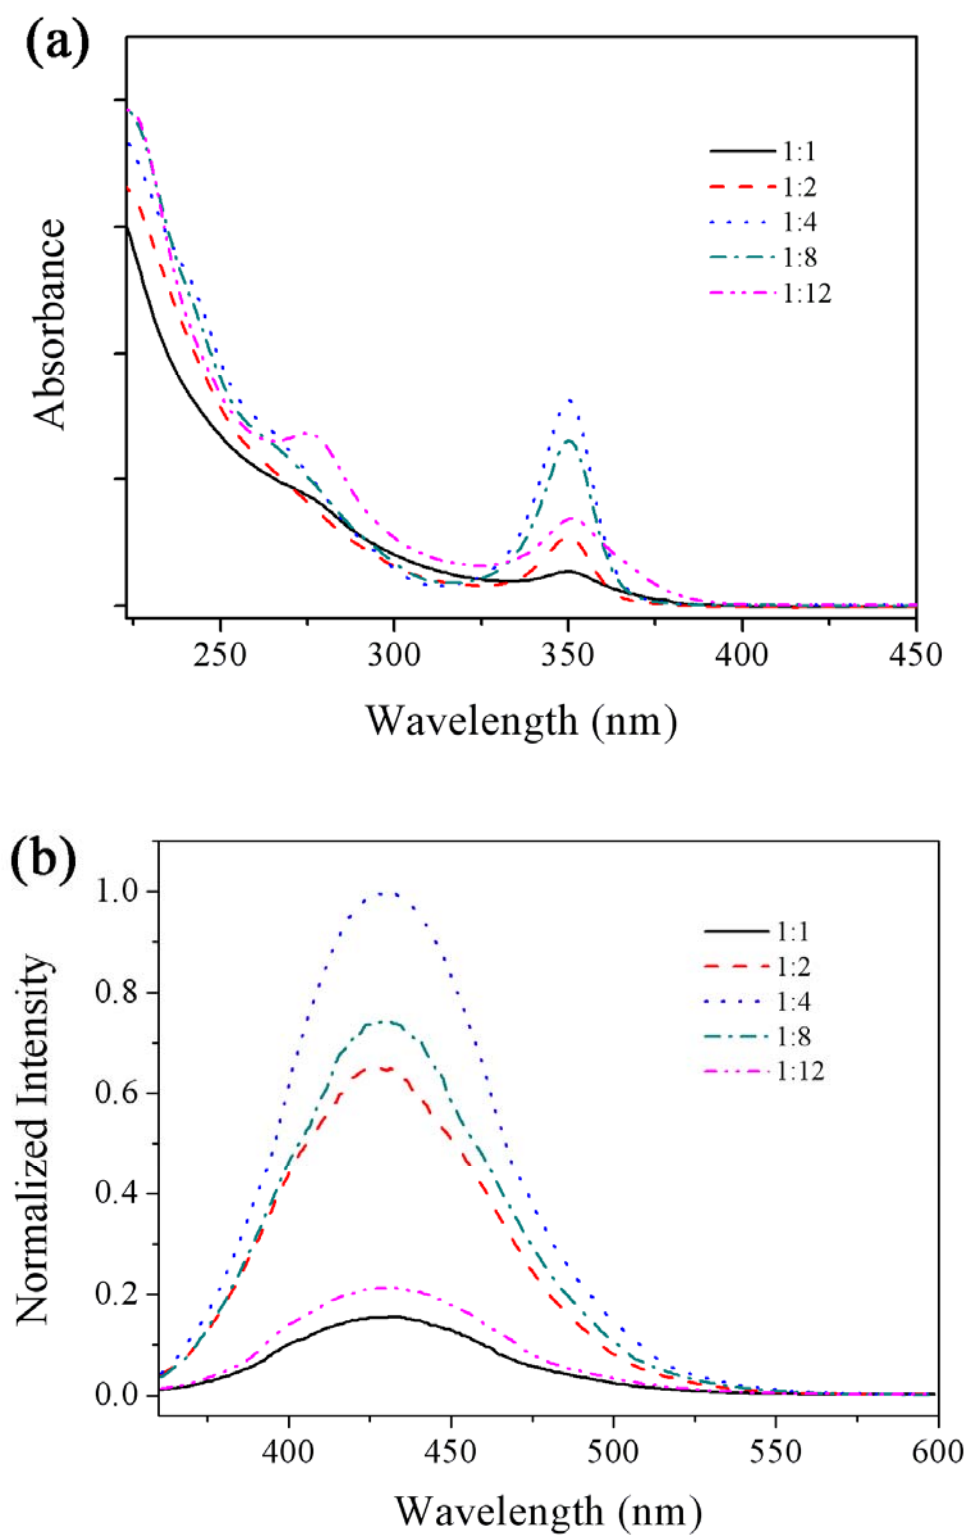

**Fig. S4** UV-Vis absorption spectra (a) and emission spectra (b) of fluorescent AgNCs prepared by sonochemical synthesis with different ratios of  $\text{Ag}^+$  to GSH.

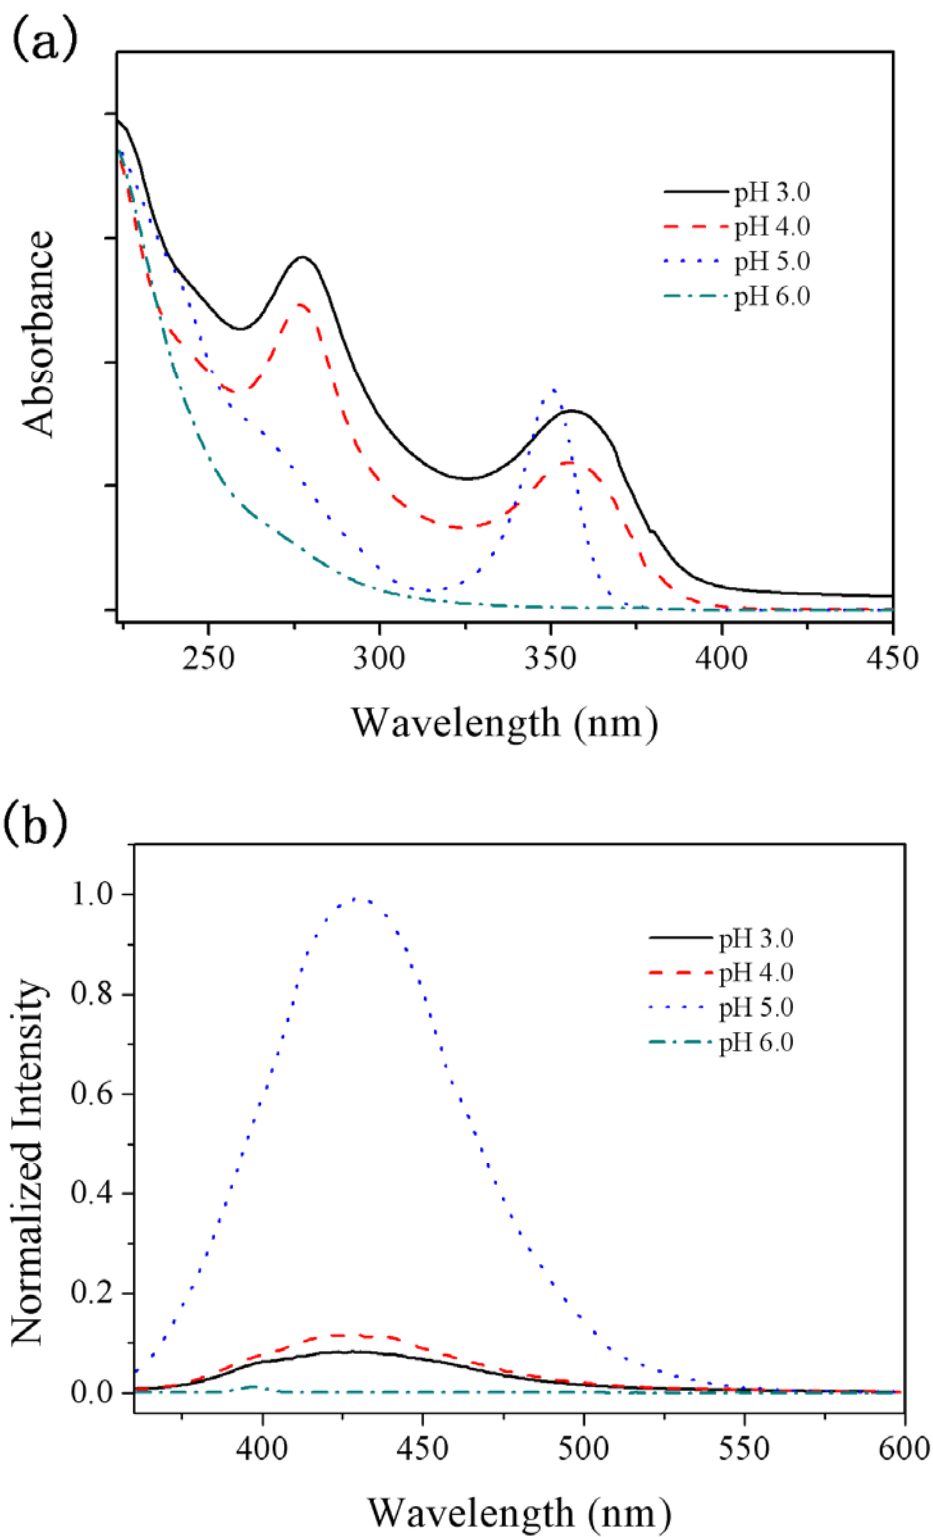

**Fig. S5** UV-Vis absorption spectra (a) and emission spectra (b) of fluorescent AgNCs prepared by sonochemical synthesis under different pH conditions.

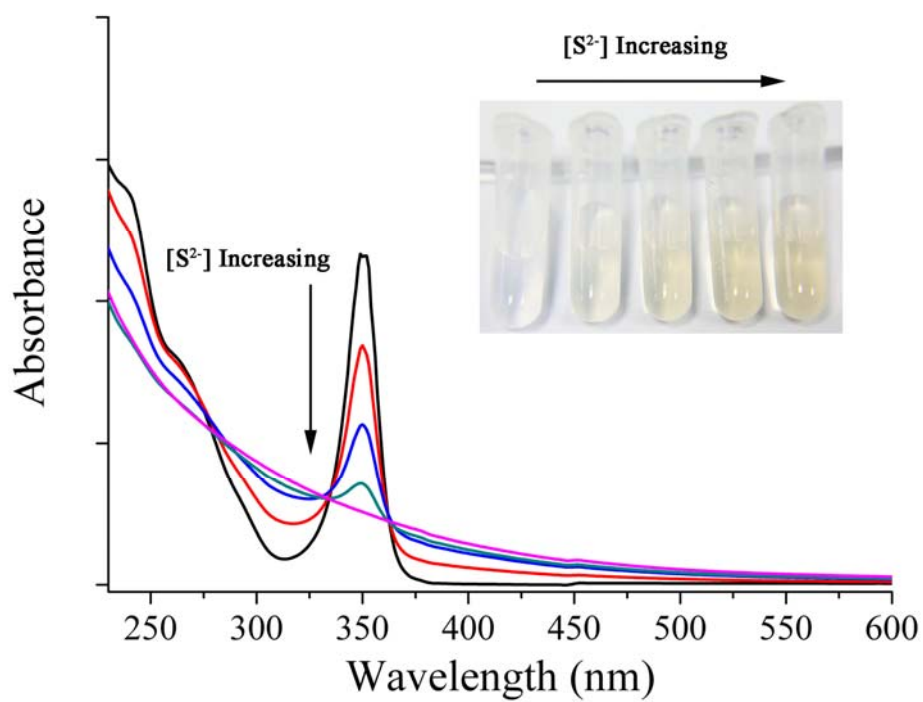

Fig. S6 UV-Vis absorption spectra of fluorescent AgNCs in the presence of different concentrations of  $S^{2-}$ . Inset: photographs of fluorescent AgNCs in the presence of different concentrations of  $S^{2-}$ .
